# Supplementary material for: Chiral self-dimerization of vanadium complexes on a SiO2 surface: the first heterogeneous catalyst for asymmetric 2-naphthol coupling
Source: Royal Society of Chemistry journal article supplement (doi:10.1039/b410307f), 2004-01-01
Supplement: b410307f.doc [file b410307f.doc]

Fig. S1: V K-edge XANES spectra for the V precursor (top), the supported V catalyst (middle), and the supported V catalyst treated with 2-naphthol (bottom).

Fig. S2: V K-edge EXAFS Fourier-transformed spectra for the V precursor (top), the supported V 3.4 wt% catalyst (middle), and the supported V catalyst treated with 2-naphthol (bottom) measured at 16 K in a transmission mode. Solid lines: observed spectra of absolute and imaginary parts, broken lines: calculated spectra of absolute and imaginary parts.

Table S1 Frequencies of vibration modes for the V precursors labeled with isotopes (13C and 15N) and the supported V catalyst (3.4 wt%) measured by FT-IR and calculated by DFT

| Mode | 12C, 14Na | 13C, 14Nb | 13C, 15Nc | Supported  catalyst | Monomerd | Crystale |
| --- | --- | --- | --- | --- | --- | --- |
| C=N) | 1629 | 1632 | 1617 | 1629 | 1617 | 1631 |
| asym (COO) | 1598 | 1560 | 1559 | 1602 | 1751 | 1571 |
| (Ph) | 1547 | 1548 | 1546 | 1554  1548 | 1544 | 1542 |
|  | 1470 | 1470 | 1470 | 1471 | 1461 | 1474 |
|  | 1447  1436 | 1447  1435 | 1446  1435 | 1452 | 1439 | 1446 |
| sym (COO) | 1373  1362 | 1353  1330 | 1351  1330 | 1370 | 1213  1198 | 1407f  1361 |
| (Ph-O) | 1290 | 1289 | 1290 | 1391 | 1317 | 1302 |

a V precursor derived from L-leucine and salicylaldehyde without any substitution of isotope atom. b Leucine-V complex labeled with 13C at the carbon atom of C=O. c Leucine-V complex labeled with 13C at the carbon atom of C=O and 15N at the nitrogen atom of C=N. d A leucine-V monomer calculated by DFT with the PW91 functional. e The crystal of the Leucine-V complex calculated by DFT with the PW91 functional. f The symmetric vibration of COO and the stretching of H-C=N are mixed.
